# Supplementary material for: Switchable behaviors of quadratic nonlinear optical properties originating from bi-step phase transitions in a molecule-based crystal
Source: Royal Society of Chemistry journal article supplement (doi:10.1039/c8tc00407b), 2018-01-01
Supplement: c8tc00407b1.pdf [file c8tc00407b1.pdf]

## Supporting Information

### Switchable Behaviors of Quadratic Nonlinear Optical Properties Originating from Bi-step Phase Transitions in a Molecule-Based Crystal

Kewen Tao,<sup>a,b</sup> Zhenyue Wu,<sup>a</sup> Shiguo Han,<sup>a</sup> Jing Zhang,<sup>a</sup> Chengmin Ji,<sup>a</sup> Yuyin Wang,<sup>a</sup> Weichuan Zhang,<sup>a</sup> Junhua Luo<sup>a</sup> and Zhihua Sun<sup>\*a,b</sup>

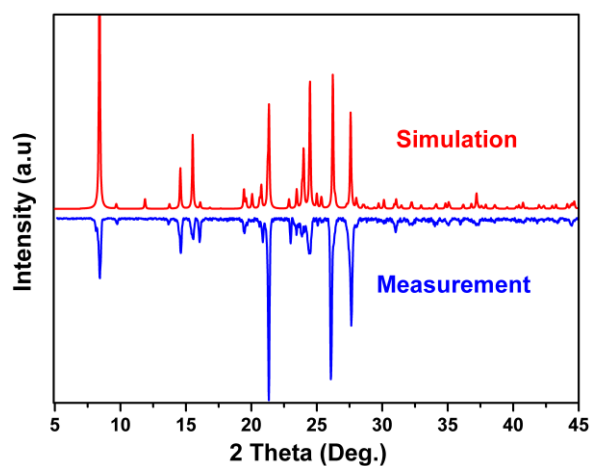

**Figure S1.** Experimental and simulated PXRD Patterns of **1**, verifying the phase purity

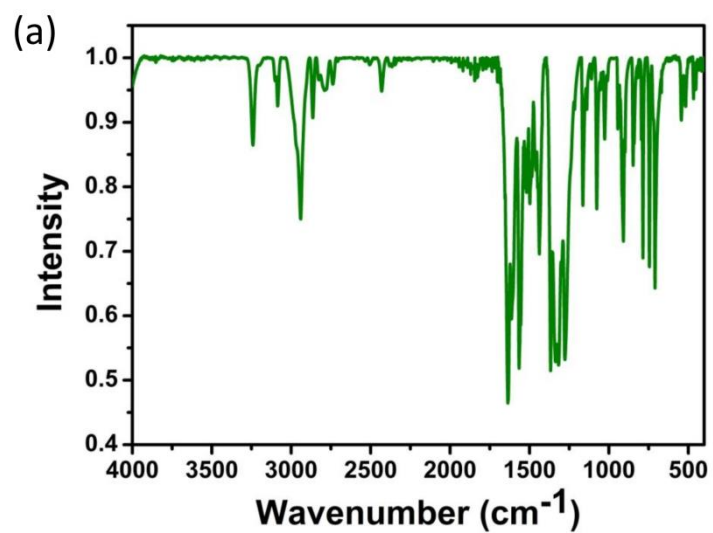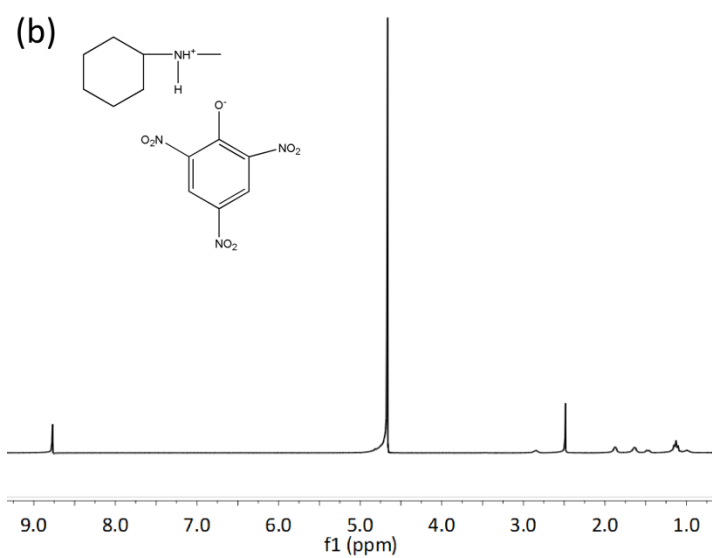

**Figure S2.** (a) IR Spectrum of 1, (b) <sup>1</sup>H NMR spectra measured in D<sub>2</sub>O for 1.

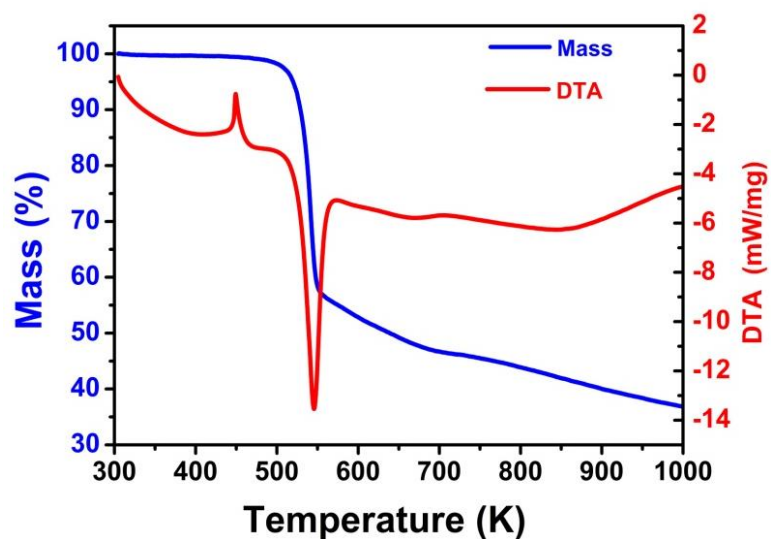

**Figure S3.** The TG/DTA curves of **1** with heating rate 10 K/min.

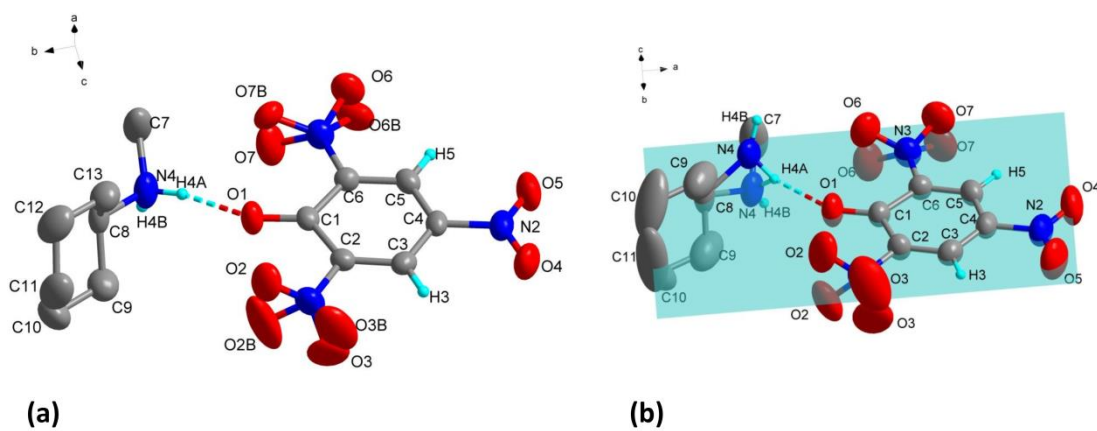

**Figure S4.** (a) N- methylcyclohexylammonium cation with little thermal ellipsoid at 260K (ITP); (b) highly-disordered N- methylcyclohexylammonium cation of **1** at 293 K. Hydrogen atoms are omitted for clarity.

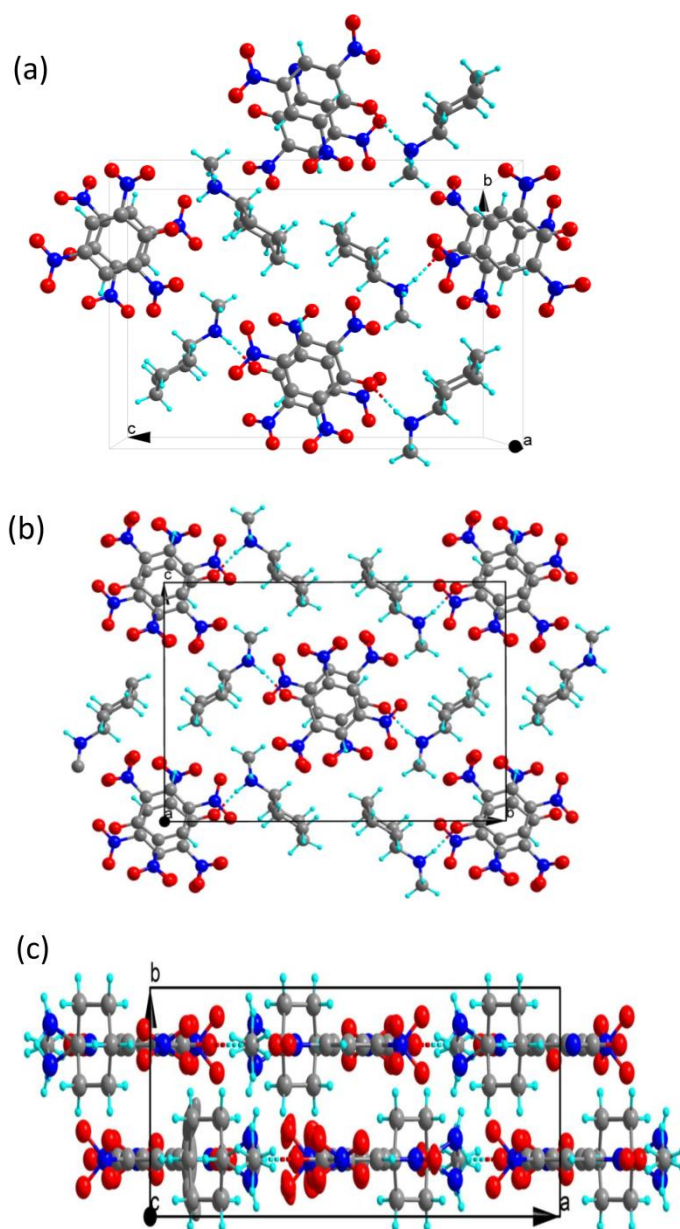

**Figure S5.** Crystal packing views of 1 along the a-axis direction in its LTP (a), along the a-axis direction in its ITP (b) and along the c-axis direction in its HTP (c).

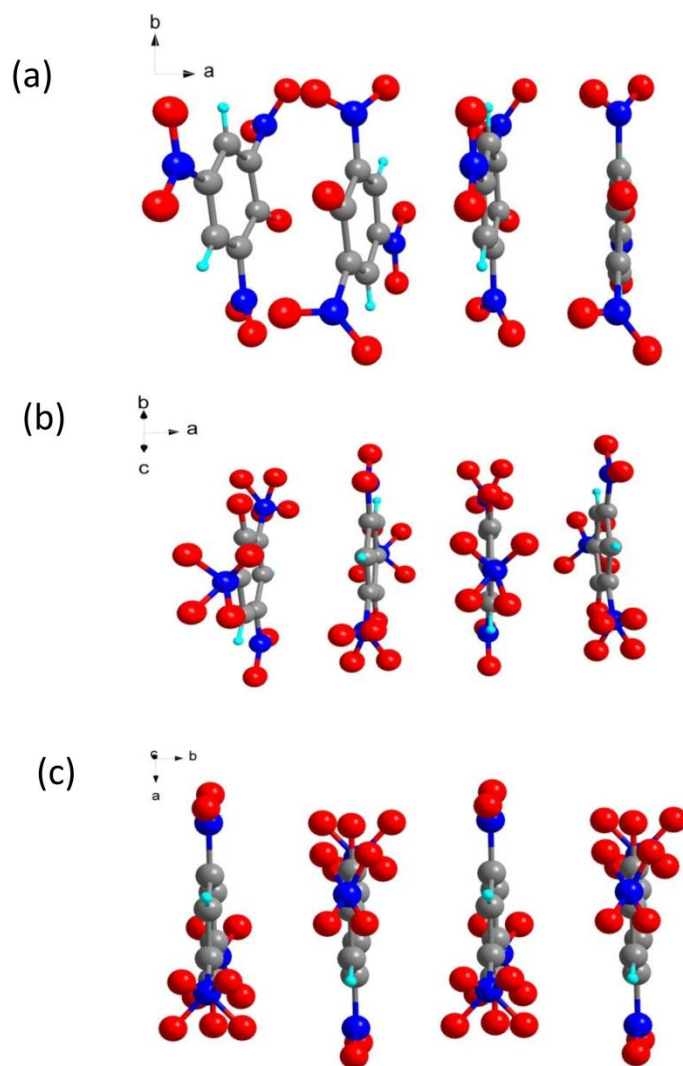

**Figure S6.** Diagrams of the adjacent picrate anions viewed along the *c*-axis at (LTP), (ITP) and (HTP) of **1**.

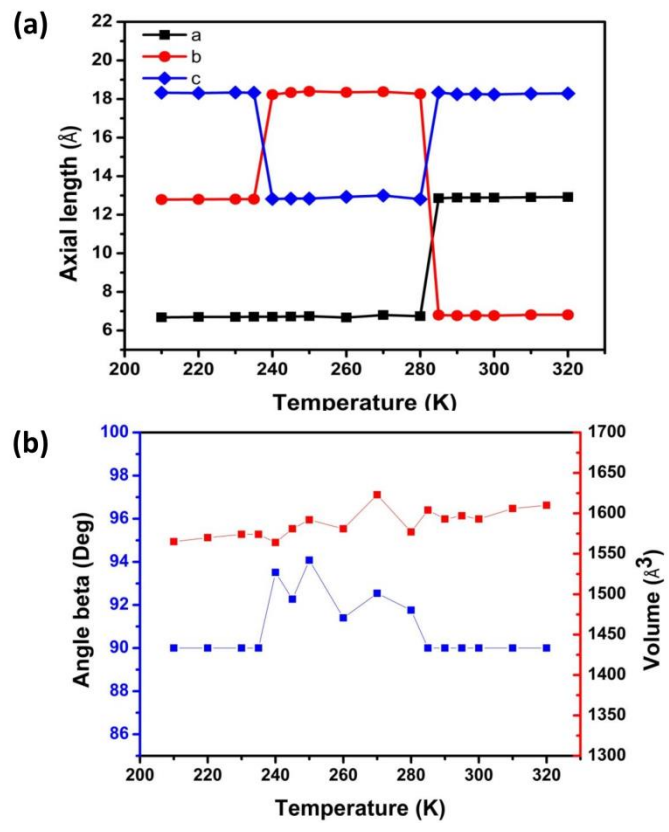

Figure S7. Temperature dependence of (a) cell parameter changes for three axis lengths and (b) crystal volume and monoclinic b angle in the range from 210 to 320 K of 1.

## Tables

**Table S1** Crystallographic data and details of data collection and refinement for **1**

| Phase                                   | LTP                                                                   | ITP                                                                   | HTP                                                                   |
|-----------------------------------------|-----------------------------------------------------------------------|-----------------------------------------------------------------------|-----------------------------------------------------------------------|
| Temperature (K)                         | 205                                                                   | 260                                                                   | 293                                                                   |
| Empirical formula                       | C <sub>13</sub> H <sub>18</sub> N <sub>4</sub> O <sub>7</sub>         | C <sub>13</sub> H <sub>18</sub> N <sub>4</sub> O <sub>7</sub>         | C <sub>13</sub> H <sub>18</sub> N <sub>4</sub> O <sub>7</sub>         |
| Formula weight                          | 342.31                                                                | 342.31                                                                | 342.31                                                                |
| Crystal system,                         | orthorhombic                                                          | monoclinic                                                            | orthorhombic                                                          |
| space group                             | P2 <sub>1</sub> 2 <sub>1</sub> 2 <sub>1</sub>                         | P2 <sub>1</sub> /n                                                    | Pnma                                                                  |
| a (Å)                                   | 6.67620(10)                                                           | 6.7455(2)                                                             | 18.2587(3)                                                            |
| b (Å)                                   | 12.7767(2)                                                            | 18.3207(6)                                                            | 6.7913(2)                                                             |
| c (Å)                                   | 18.3011(3)                                                            | 12.8506(5)                                                            | 12.8788(3)                                                            |
| V(Å <sup>3</sup> )                      | 1561.08(4)                                                            | 1585.19(9)                                                            | 1596.98(7)                                                            |
| Z                                       | 4                                                                     | 4                                                                     | 4                                                                     |
| Calculated density (mg/Å <sup>3</sup> ) | 1.456                                                                 | 1.434                                                                 | 1.424                                                                 |
| F(000)                                  | 720.0                                                                 | 720.0                                                                 | 720.0                                                                 |
| Limiting indices                        | -7 ≤ h ≤ 7,<br>-10 ≤ k ≤ 15,<br>-15 ≤ l ≤ 21                          | -8 ≤ h ≤ 8,<br>-22 ≤ k ≤ 22,<br>0 ≤ l ≤ 15                            | -22 ≤ h ≤ 15,<br>-5 ≤ k ≤ 7,<br>-15 ≤ l ≤ 14                          |
| Reflections collected/unique            | 4847/2533 [R <sub>int</sub> =<br>0.0137, R <sub>sigma</sub> = 0.0188] | 3078/3078 [R <sub>int</sub> = 0.0170,<br>R <sub>sigma</sub> = 0.0169] | 4977/1672 [R <sub>int</sub> = 0.0160,<br>R <sub>sigma</sub> = 0.0191] |
| Completeness                            | 99%                                                                   | 97%                                                                   | 96%                                                                   |
| Data / restraints/parameters            | 2533/0/218                                                            | 3078/74/262                                                           | 1672/4/162                                                            |
| Goodness-of-fit on F <sup>2</sup>       | 1.037                                                                 | 1.020                                                                 | 1.008                                                                 |
| Final R indices [I > 2σ(I)]             | R <sub>1</sub> = 0.0319, wR <sub>2</sub> =<br>0.0842                  | R <sub>1</sub> = 0.0723, wR <sub>2</sub> =<br>0.1359                  | R <sub>1</sub> = 0.0621, wR <sub>2</sub> =<br>0.1029                  |

**Table S2** Fractional Atomic Coordinates ( $\times 10^4$ ) and Equivalent Isotropic Displacement Parameters ( $\text{\AA}^2 \times 10^3$ ) for 1 at 205 K.  $U_{\text{eq}}$  is defined as 1/3 of the trace of the orthogonalised  $U_{\text{H}}$  tensor.

| Atom | <i>x</i> | <i>y</i>   | <i>z</i>   | $U(\text{eq})$ |
|------|----------|------------|------------|----------------|
| O1   | 2394(3)  | 2791.0(12) | 6437.4(7)  | 37.4(4)        |
| C3   | 2300(3)  | 1186.5(15) | 4800.7(11) | 27.1(4)        |
| O5   | 2484(3)  | 2379.9(14) | 3049.8(8)  | 50.6(5)        |
| C6   | 2276(3)  | 3287.6(15) | 5177(1)    | 25.5(4)        |
| C5   | 2329(3)  | 3010.9(16) | 4454.7(11) | 26.9(4)        |
| N3   | 2267(3)  | 4404.9(14) | 5332.0(9)  | 32.0(4)        |
| C1   | 2265(3)  | 2556.2(15) | 5778.3(10) | 25.0(4)        |
| O4   | 2365(3)  | 749.7(14)  | 3336.8(9)  | 51.3(5)        |
| C4   | 2320(3)  | 1959.8(16) | 4267.8(10) | 27.3(4)        |
| N2   | 2378(3)  | 1680.9(15) | 3503.8(10) | 35.1(4)        |
| N1   | 2215(3)  | 654.2(15)  | 6063.3(10) | 38.0(4)        |
| O2   | 1072(3)  | 734.2(15)  | 6581.4(9)  | 52.3(5)        |
| O6   | 3131(3)  | 4994.6(13) | 4905(1)    | 49.4(5)        |
| O7   | 1368(3)  | 4707.6(13) | 5874.2(10) | 51.9(5)        |
| O3   | 3292(5)  | -96.2(18)  | 5962.1(13) | 84.1(8)        |
| N4   | 1597(3)  | 4238.7(15) | 7526.9(9)  | 35.8(4)        |
| C8   | 2040(3)  | 3649.9(17) | 8222.9(10) | 31.9(5)        |
| C13  | 4029(4)  | 3091(2)    | 8176.9(13) | 41.4(6)        |
| C9   | 349(4)   | 2895(2)    | 8383.3(14) | 45.2(6)        |
| C7   | 2846(5)  | 5190.0(19) | 7421.3(13) | 48.2(6)        |
| C10  | 741(5)   | 2350(2)    | 9109.3(17) | 55.6(7)        |
| C11  | 2753(5)  | 1788(2)    | 9102.0(16) | 58.6(8)        |
| C12  | 4439(4)  | 2531(2)    | 8897.5(16) | 53.6(7)        |
| C2   | 2247(3)  | 1486.1(15) | 5517.3(11) | 26.5(4)        |



**Table S3** Fractional Atomic Coordinates ( $\times 10^4$ ) and Equivalent Isotropic Displacement Parameters ( $\text{\AA}^2 \times 10^3$ ) for 1 at 260 K.  $U_{\text{eq}}$  is defined as 1/3 of the trace of the orthogonalised  $U_{\text{H}}$  tensor.

| Atom | <i>x</i> | <i>y</i>   | <i>z</i>   | $U(\text{eq})$ |
|------|----------|------------|------------|----------------|
| O1   | 2604(4)  | 6449.3(11) | 4722.8(17) | 61.1(7)        |
| O4   | 2474(5)  | 3366.7(14) | 6769(2)    | 88.9(10)       |
| O5   | 2244(5)  | 3073.9(13) | 5152(2)    | 81.3(9)        |
| O2   | 3924(8)  | 6604(2)    | 6777(3)    | 78.5(16)       |
| O3   | 1784(14) | 5992(4)    | 7593(6)    | 132(3)         |
| O6   | 3067(11) | 4883(3)    | 2534(3)    | 78.5(15)       |
| O7   | 1701(12) | 5905(2)    | 2800(3)    | 90(2)          |
| O2B  | 1920(60) | 6649(9)    | 6738(13)   | 169(12)        |
| O3B  | 3160(40) | 5900(14)   | 7722(15)   | 118(9)         |
| O6B  | 1800(30) | 4812(9)    | 2576(11)   | 75(4)          |
| O7B  | 3250(30) | 5922(7)    | 2854(9)    | 61(4)          |
| N1   | 2782(6)  | 6088.1(17) | 6860(2)    | 65.1(8)        |
| N2   | 2404(4)  | 3527.5(15) | 5849(2)    | 59.4(7)        |
| N3   | 2451(5)  | 5335.0(15) | 3122(2)    | 55.7(7)        |
| C1   | 2588(4)  | 5795.8(15) | 4964(2)    | 39.2(6)        |
| C2   | 2637(4)  | 5540.2(15) | 6030(2)    | 41.0(6)        |
| C3   | 2568(4)  | 4826.4(16) | 6331(2)    | 45.0(7)        |
| C4   | 2486(4)  | 4291.0(15) | 5567(2)    | 42.2(6)        |
| C5   | 2468(4)  | 4474.1(15) | 4524(2)    | 42.9(7)        |
| C6   | 2500(4)  | 5189.0(15) | 4237(2)    | 39.9(6)        |
| N4   | 1748(6)  | 7542.7(16) | 3289(2)    | 67.3(9)        |
| C7   | 2810(8)  | 7472(2)    | 2322(3)    | 91.3(16)       |
| C8   | 2233(6)  | 8229.7(16) | 3907(2)    | 55.9(9)        |
| C9   | 710(6)   | 8325(2)    | 4695(3)    | 76.9(11)       |
| C10  | 1118(9)  | 9034(2)    | 5304(4)    | 104.0(18)      |
| C11  | 3209(9)  | 9059(3)    | 5765(3)    | 96.3(16)       |
| C12  | 4700(8)  | 8923(3)    | 4984(4)    | 91.3(15)       |
| C13  | 4278(6)  | 8215(2)    | 4401(3)    | 68(1)          |

**Table S4** Fractional Atomic Coordinates ( $\times 10^4$ ) and Equivalent Isotropic Displacement Parameters ( $\text{\AA}^2 \times 10^3$ ) for 1 at 293 K.  $U_{\text{eq}}$  is defined as 1/3 of the trace of the orthogonalised  $U_{\text{H}}$  tensor.

| Atom | <i>x</i>   | <i>y</i> | <i>z</i>  | $U(\text{eq})$ |
|------|------------|----------|-----------|----------------|
| O1   | 3552.1(11) | 2500     | 294.0(19) | 82.8(8)        |
| O2   | 3371(2)    | 3726(8)  | -1727(3)  | 123.8(19)      |
| O3   | 3998(3)    | 1676(11) | -2589(4)  | 175(4)         |
| O4   | 6932.1(14) | 2500     | -193(3)   | 112.0(12)      |
| O5   | 6622.1(15) | 2500     | -1787(3)  | 123.4(13)      |
| O6   | 4108.3(19) | 1703(7)  | 2178(2)   | 106(2)         |
| O7   | 5149(2)    | 1840(7)  | 2438(3)   | 101(2)         |
| N1   | 3891(2)    | 2500     | -1822(3)  | 95.9(12)       |
| N2   | 6469.3(16) | 2500     | -875(3)   | 82.4(9)        |
| N3   | 4678.6(17) | 2500     | 1869(2)   | 75.9(9)        |
| C1   | 4206.4(15) | 2500     | 45(2)     | 56.0(8)        |
| C2   | 4452.1(16) | 2500     | -1017(2)  | 59.7(8)        |
| C3   | 5164.8(17) | 2500     | -1322(3)  | 61.6(8)        |
| C4   | 5706.5(16) | 2500     | -578(3)   | 59.8(8)        |
| C5   | 5533.5(16) | 2500     | 455(3)    | 58.8(8)        |
| C6   | 4816.5(16) | 2500     | 757(2)    | 55.8(7)        |
| N4   | 2440(2)    | 1611(7)  | 1685(3)   | 79.3(14)       |
| C7   | 2524(2)    | 2500     | 2692(3)   | 132(2)         |
| C8   | 1760.8(18) | 2500     | 1083(3)   | 90.9(15)       |
| C9   | 1725(2)    | 733(6)   | 453(3)    | 134.1(15)      |
| C10  | 1015(3)    | 748(11)  | -117(4)   | 214(4)         |
| C11  | 953(5)     | 2500     | -756(5)   | 256(10)        |
